# Supplementary material
Source: PubMed Central journal article supplement (PMC3837726)
Supplement: AEM.02785-13_zam999104892so1.pdf [file AEM.02785-13_zam999104892so1.pdf]

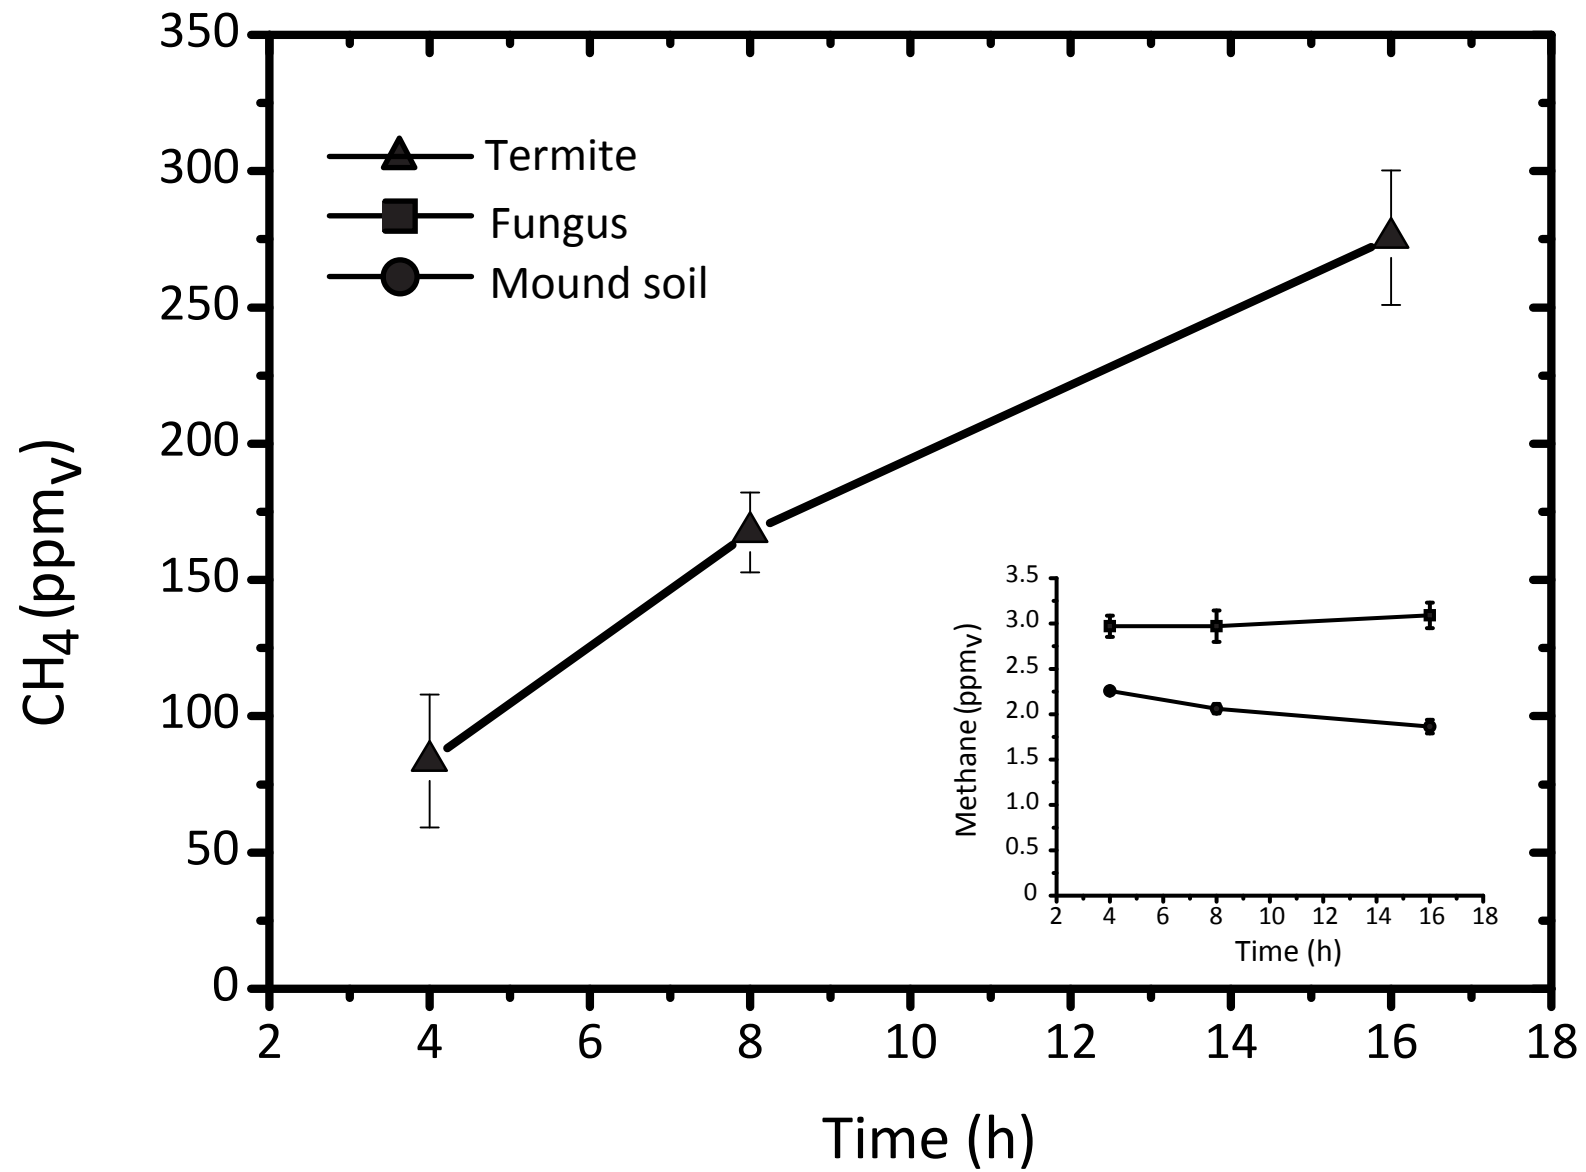

Figure S1: Methane flux measurements for termite, and for fungus and mound material (inset) (mean  $\pm$  sd;  $n=3$ ).
